# Supplementary material for: Clustering huge protein sequence sets in linear time
Source: PubMed Central journal article supplement (PMC6026198; doi:10.1038/s41467-018-04964-5), 2018-06-29
Supplement: 41467_2018_4964_MOESM1_ESM.pdf [file 41467_2018_4964_MOESM1_ESM.pdf]

# Clustering huge protein sequence sets in linear time

Martin Steinegger<sup>1,2,3</sup> & Johannes Söding<sup>1,\*</sup>

<sup>1</sup>Quantitative and Computational Biology group, Max-Planck Institute for Biophysical Chemistry, Am Fassberg 11, 37077 Göttingen, Germany. <sup>2</sup>Department for Bioinformatics and Computational Biology, Technische Universität München, 85748 Garching, Germany, <sup>3</sup>Seoul National University, Seoul, Korea

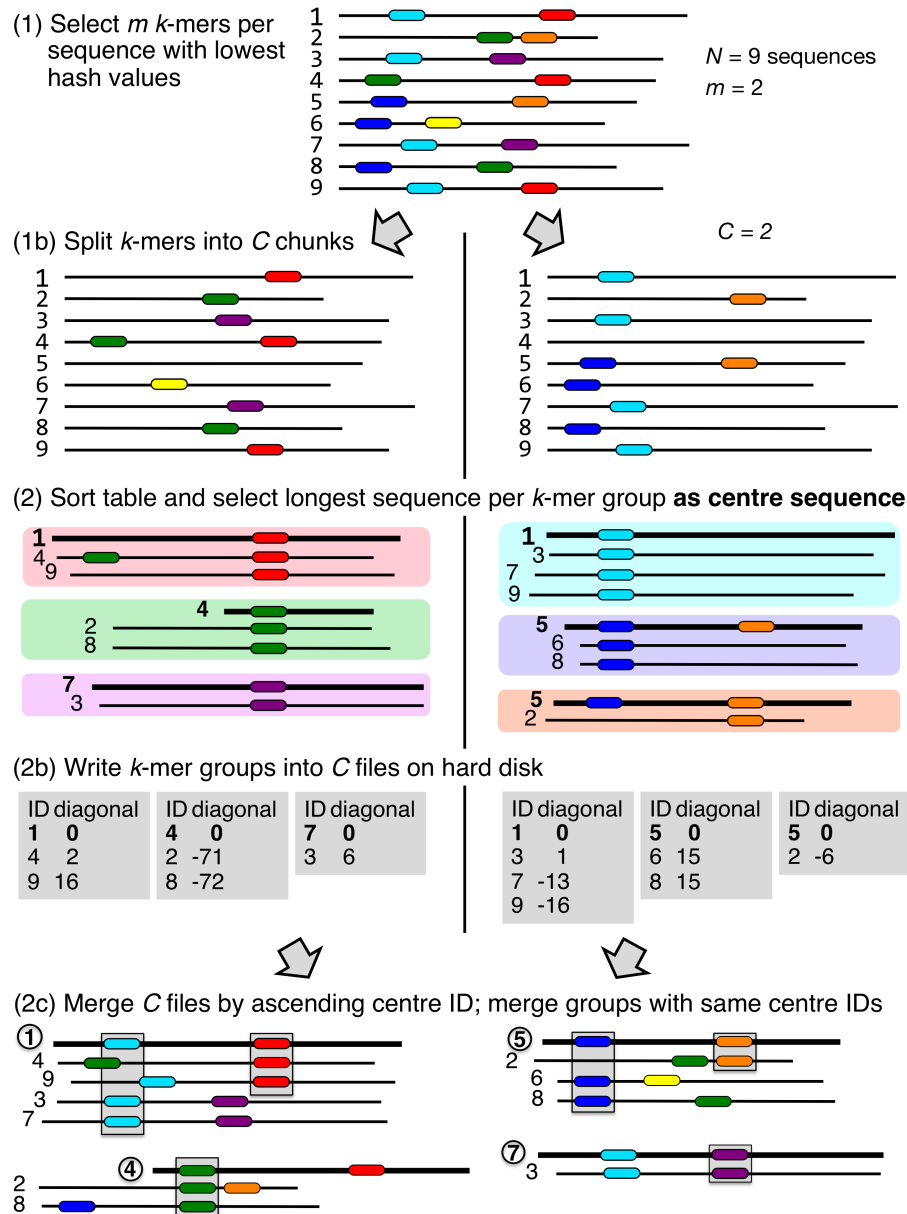

**Supplementary Figure 1. Splitting the database into chunks** For each chunk index  $c \in \{0, \dots, C-1\}$  we run Linclust steps 1 and 2 (Figure 1) normally but extract only  $k$ -mers whose numerical index modulo  $C$  yields a rest  $c$ . This way each of the  $C$  runs builds up a  $k$ -mer table with only about  $mN/C$  lines instead of  $mN$ , and hence each run needs  $C$  times less memory. Each run writes out a file with all found  $k$ -mer groups (sequence ID, diagonal). The diagonal is  $i - j$  of the  $k$ -mer match, where  $i$  is the position of the groups  $k$ -mer in the centre sequence and  $j$  the position in the other sequence. Afterwards all  $C$  files are merged into a single file such that  $k$ -mer groups are sorted by ascending centre IDs. Finally, Linclust steps 3 to 5 are performed as usual.

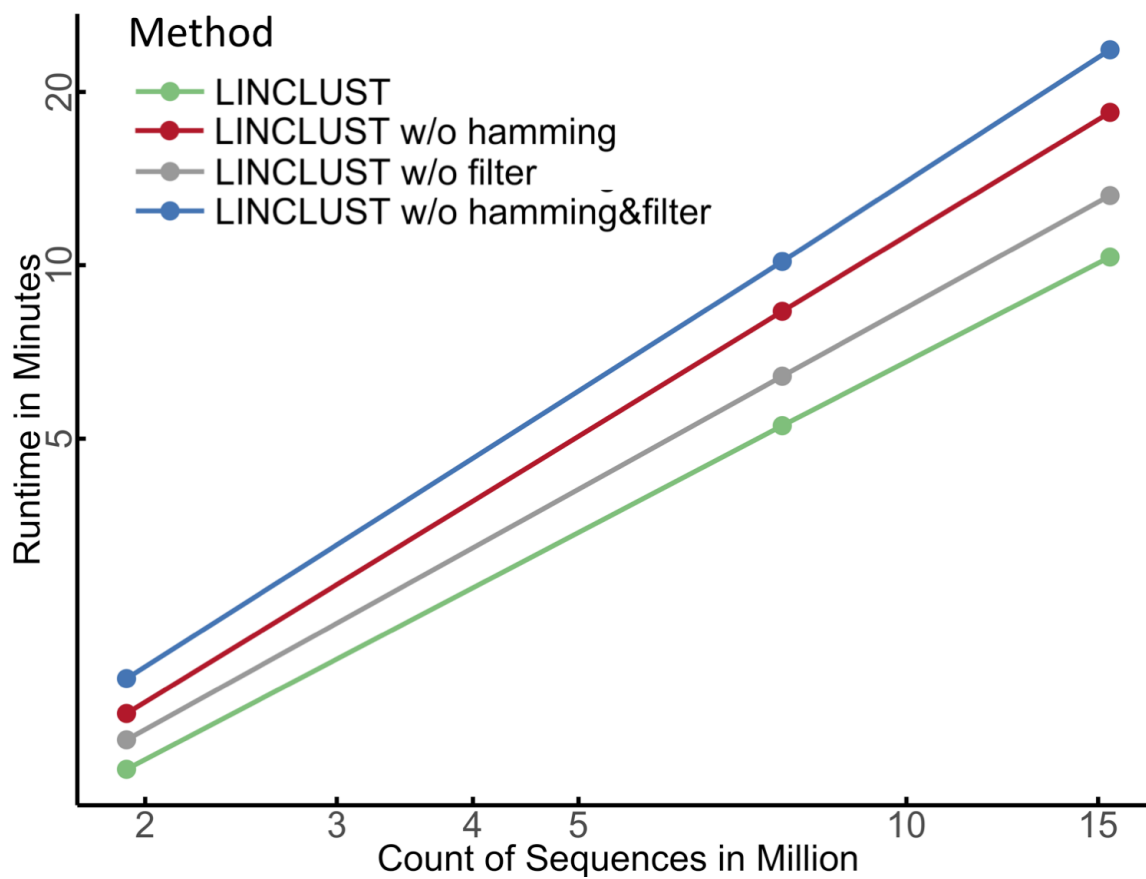

**Supplementary Figure 2. Contribution of Hamming distance pre-clustering and gapless local alignment filter steps to the decrease of the Linclust runtime** Double-logarithmic plot of runtimes versus sequence set size illustrating the contribution of runtime decrease for the Hamming distance pre-clustering and ungapped alignment filtering stage.

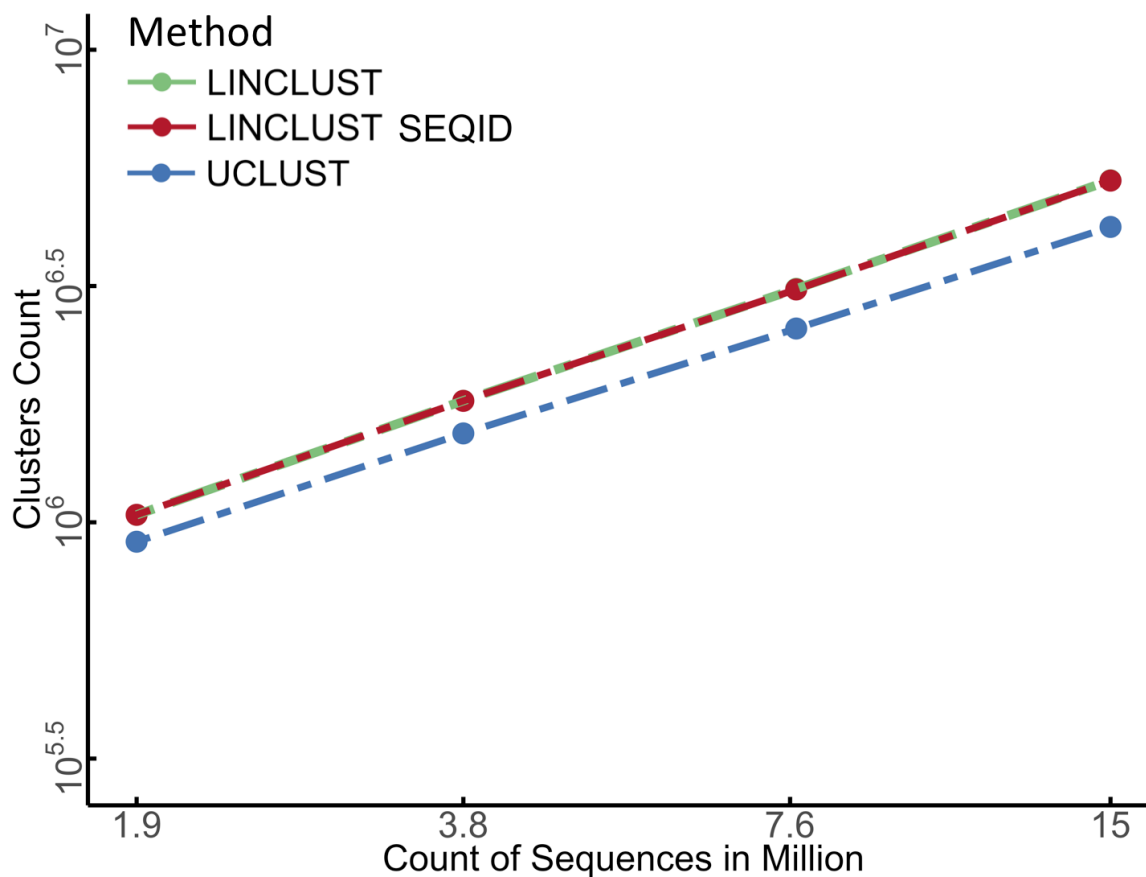

**Supplementary Figure 3. Equivalence of two sequence identity measures.** Number of clusters obtained at 50% sequence identity for Linclust with two different sequence identity definitions: (1) the default definition ("Linclust"), based on the local alignment score divided by the maximum length of the two aligned sequence segments; and (2) the fraction of identical residues in the alignment relative to the number of aligned columns including gaps ("Linclust seqid"). Both measures produce very similar numbers of clusters.

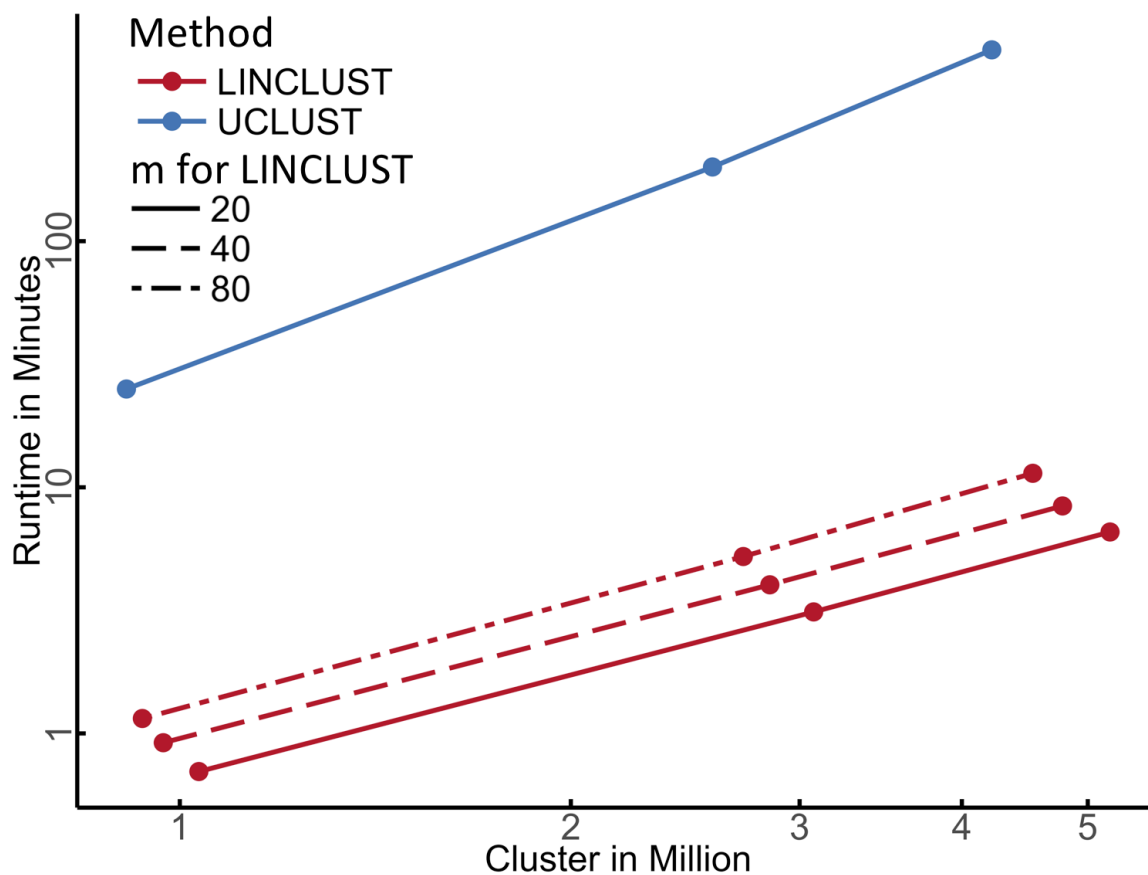

**Supplementary Figure 4. Influence of the number  $m$  of  $k$ -mers extracted per sequence.** Double-logarithmic plot of runtimes versus cluster size. Through the parameter  $m$ , the number of  $k$ -mers selected per sequence, the user can set the trade-off between sensitivity and speed. At  $m = 80$  the runtime of Linclust increases by a factor of 1.66 over the default setting  $m = 20$  while producing 8% fewer clusters. At  $m = 80$ , Linclust generates only 7% more clusters than UCLUST while still being much faster.

```

// (c) 2017 Johannes Soeding & Martin Steinegger, Gnu Public License version 3
// Rotate left macro: left circular shift by numbits within 16 bits

#define RoL(val, numbits) (val << numbits) ^ (val >> (16 - numbits))

// Transform each letter x[i] to a fixed random number RAND[x[i]]
// to ensure instantaneous mixing into the 16 bits
// Do XOR with RAND[x[i]] and 5-bit rotate left for each i from 1 to k
unsigned circ_hash(const int * x, unsigned length){
    short unsigned RAND[21] = {0x4567, 0x23c6, 0x9869, 0x4873, 0xdc51, 0x5cff, 0x944a, 0x58ec,
                               0x1f29, 0x7ccd, 0x58ba, 0xd7ab, 0x41f2, 0x1efb, 0xa9e3, 0xe146,
                               0x007c, 0x62c2, 0x0854, 0x27f8, 0x231b}; // 16 bit random numbers

    short unsigned h = 0x0;
    h = h ^ RAND[x[0]]; // XOR h and ki
    for (int i = 1; i < length; ++i){
        h = RoL(h, 5);
        h ^= RAND[x[i]]; // XOR h and ki
    }
    return h;
}

// Rolling hash variant for previous hash function:
// Computes hash value for next key x[0:length-1] from previous hash value
// hash( x[-1:length-2] ) and x_first = x[-1]
unsigned circ_hash_next(const int * x, unsigned length, int x_first, short unsigned h){
    short unsigned RAND[21] = {0x4567, 0x23c6, 0x9869, 0x4873, 0xdc51, 0x5cff, 0x944a, 0x58ec,
                               0x1f29, 0x7ccd, 0x58ba, 0xd7ab, 0x41f2, 0x1efb, 0xa9e3, 0xe146,
                               0x007c, 0x62c2, 0x0854, 0x27f8, 0x231b}; // 16 bit random numbers

    // undo INITIAL_VALUE and first letter x[0] of old key
    h ^= RoL(RAND[x_first], (5*(length-1)) % 16);
    // circularly permute all letters x[1:length-1] to 5 positions to left
    h = RoL(h, 5);
    // add new, last letter of new key x[1:length]
    h ^= RAND[x[length-1]];
    return h;
}

```

Supplementary Figure 5. *k*-mer hashing function implemented in C.
